# Supplementary material for: One-Step Synthesis, Crystallography, and Acute Toxicity of Two Boronic-Carbohydrate Adducts which Induced Sedation in Mice
Source: Preprints.org preprint supplement (doi:10.20944/preprints202405.1343.v1), 2024-05-21
Supplement: Supplementary file 1 [file supplementary]

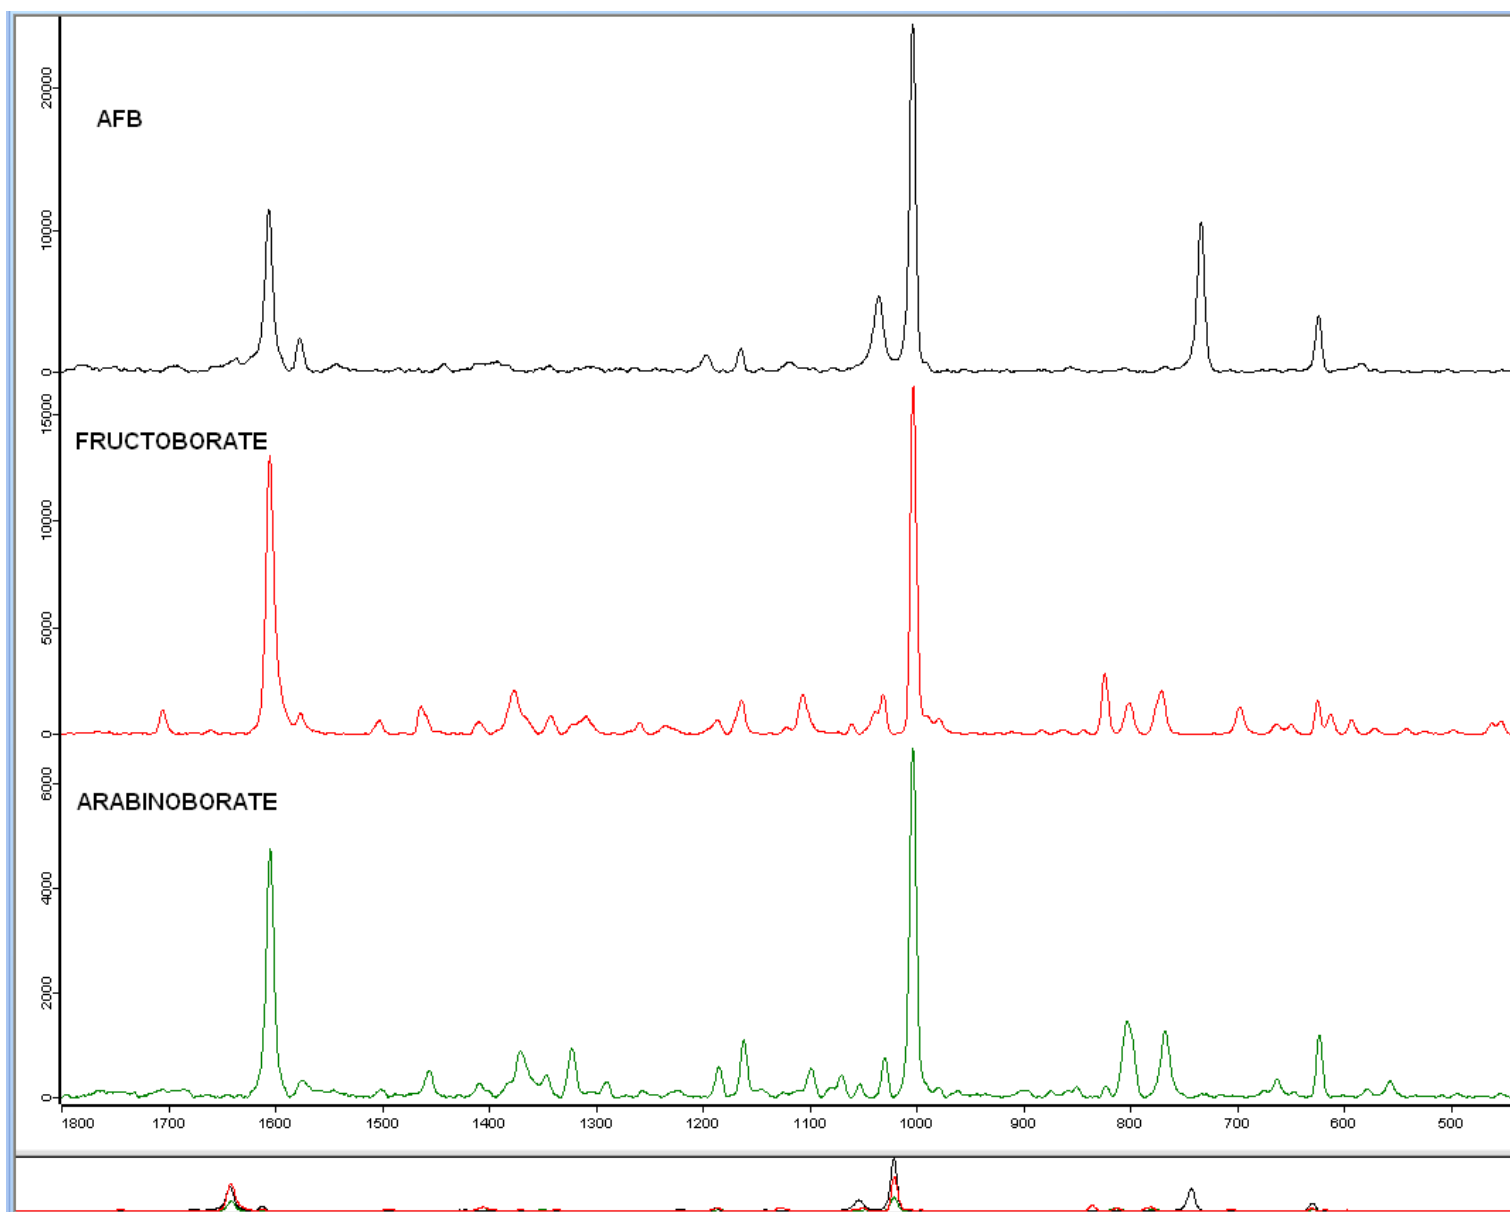

Fig S1. Raman spectra comparison of phenylboronic acid (above),  $\beta$ -D-fructopyranoborate (FB-1) (middle), and  $\beta$ -D-arabinopyranoborate (AB-1) (below).

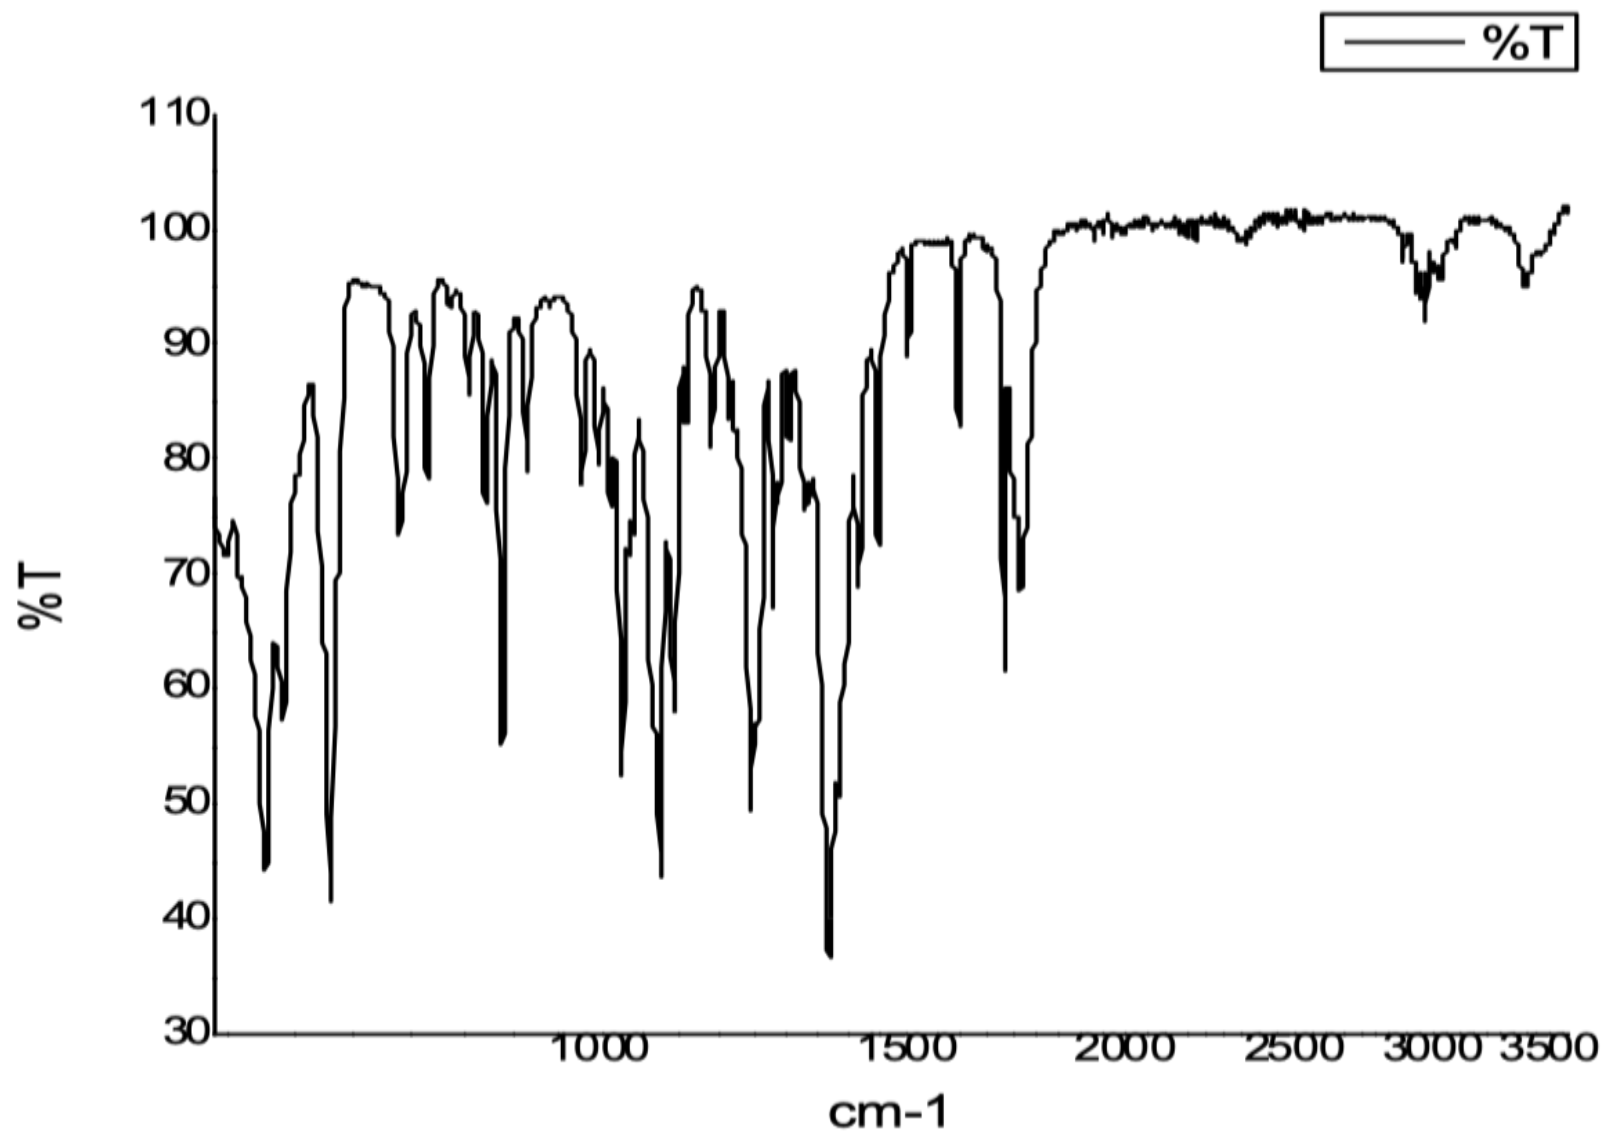

Fig S2. IR-FT spectrum of the  $\beta$ -D-fructopyranoborate (FB-1).

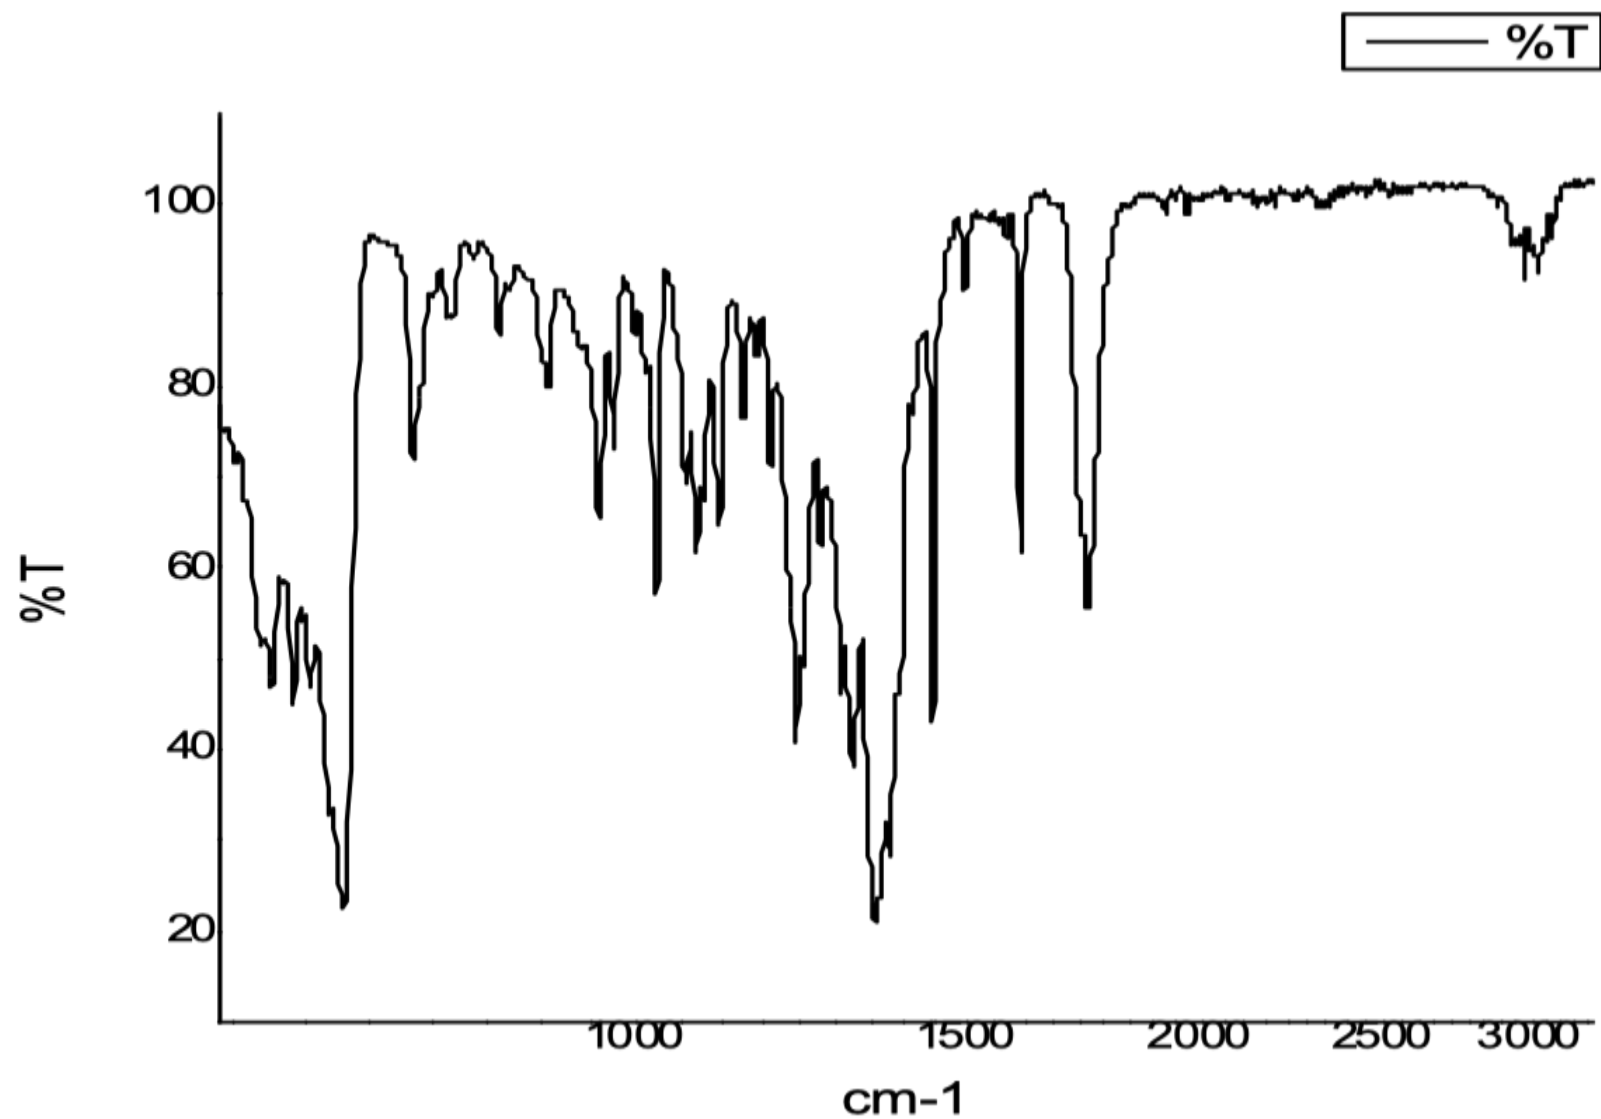

Fig S3. IR-FT spectrum of the  $\beta$ -D-arabinopyranoborate (AB-1).

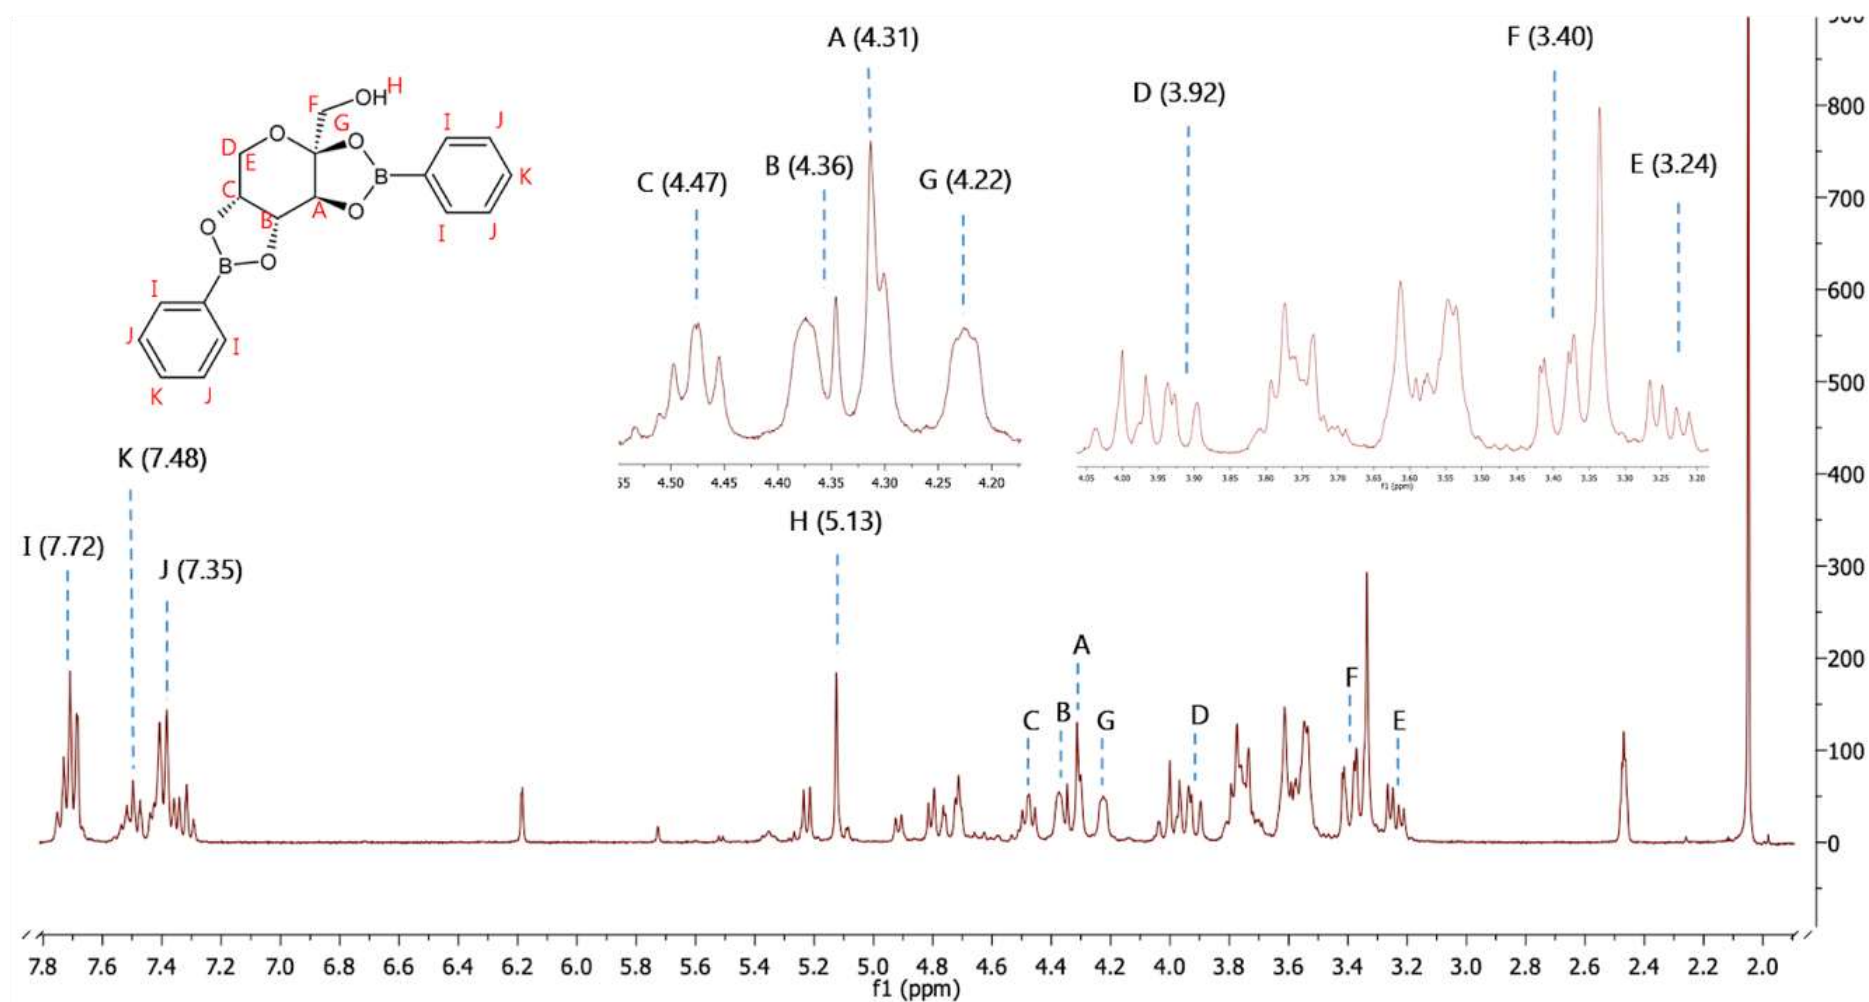

Fig S4.  $^1\text{H}$  RMN ( $\text{DMSO}-d_6$ , 300 MHz) of the  $\beta$ -D-fructopyranoborate (FB-1).

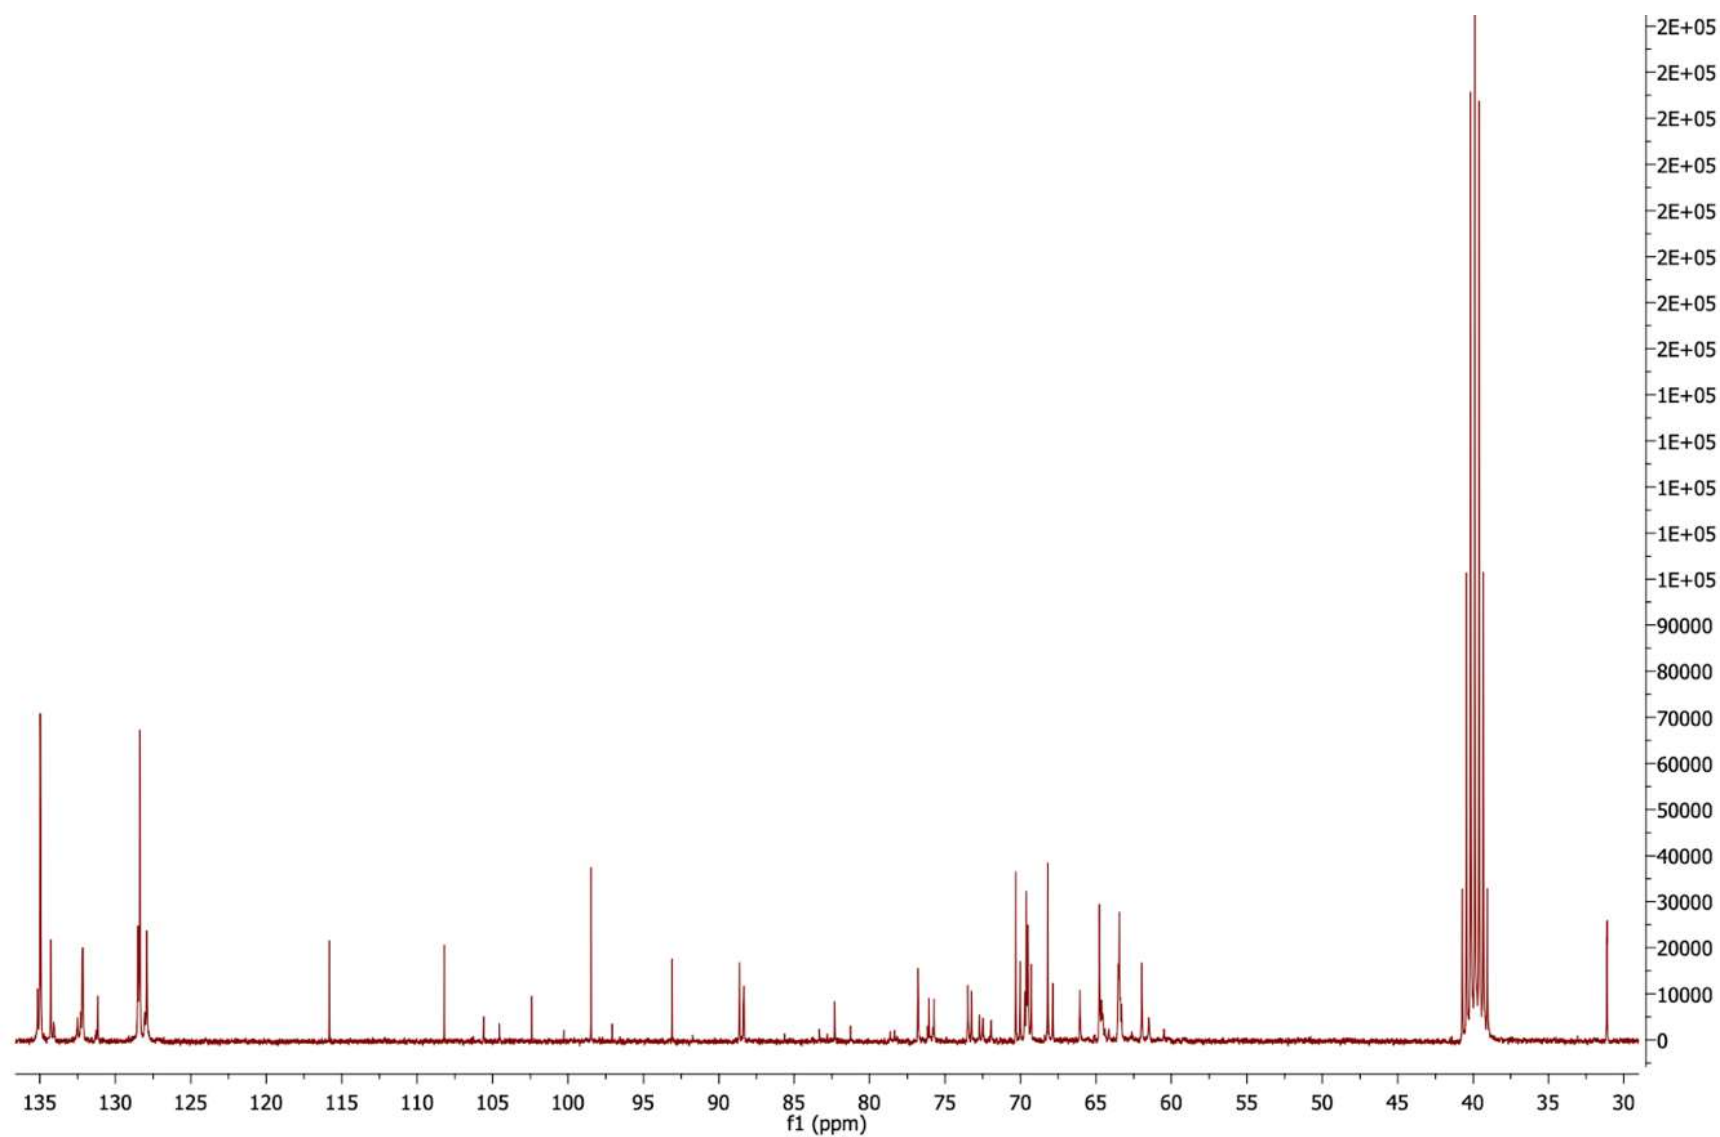

Fig S5.  $^{13}\text{C}$  RMN ( $\text{DMSO}-d_6$ , 76.5 MHz) of the  $\beta$ -D-fructopyranoborate (FB-1).

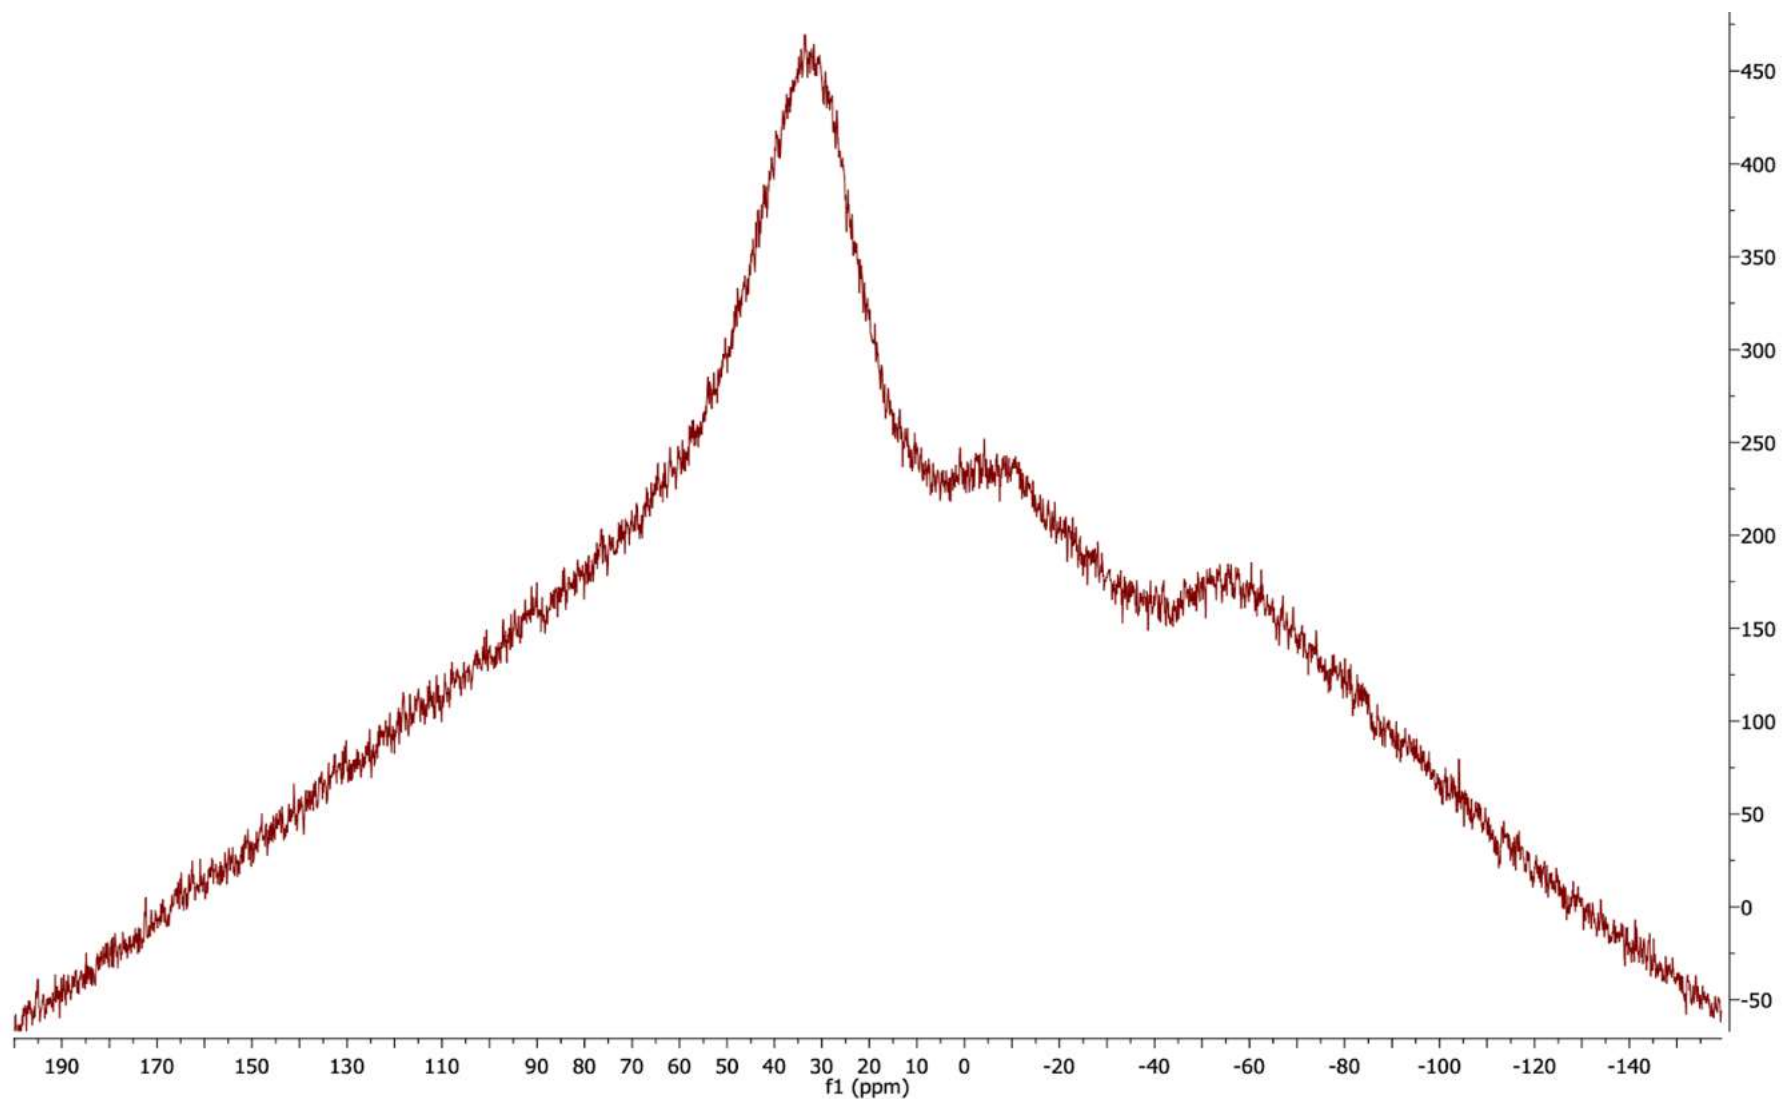

Fig S6.  $^{11}\text{B}$  RMN ( $\text{DMSO-}d_6$ , 96 MHz) of the  $\beta\text{-D-fructopyranoborate}$  (FB-1).

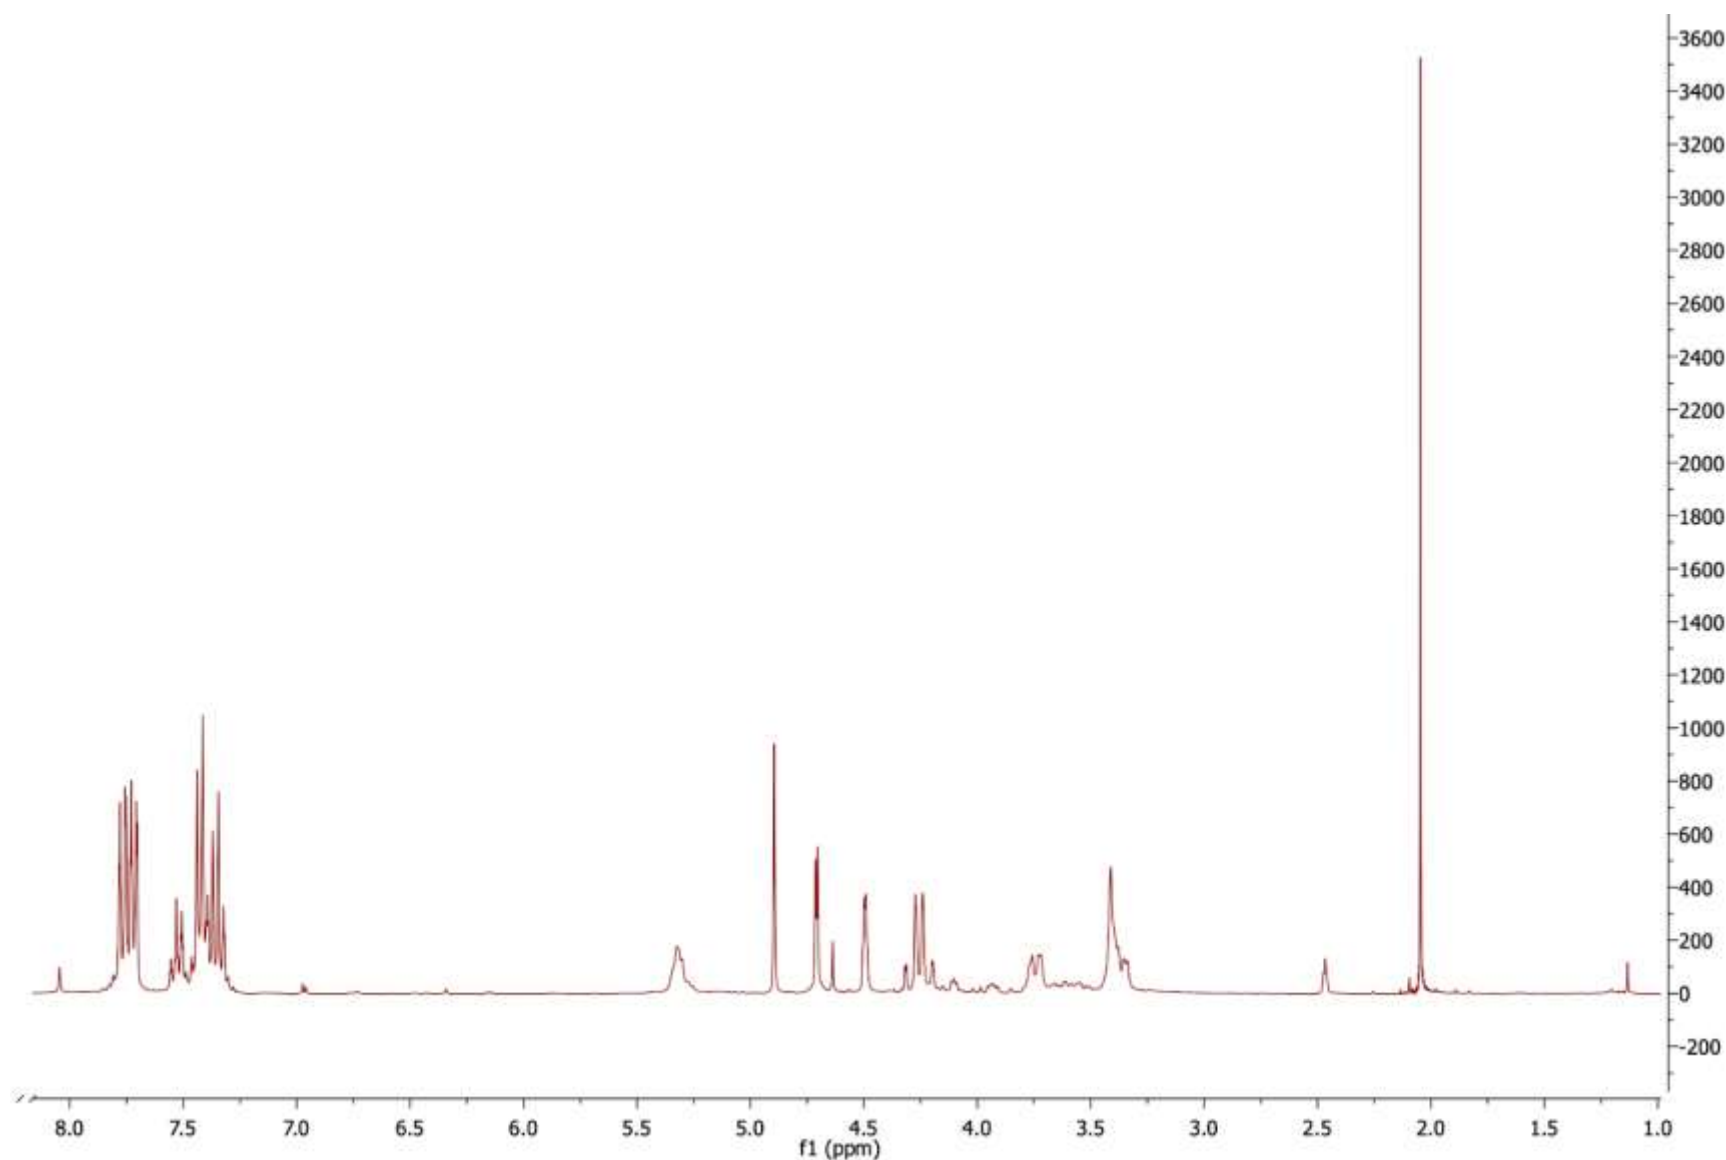

Fig S7.  $^1\text{H}$  RMN ( $\text{DMSO}-d_6$ , 300 MHz) of the  $\beta$ -D-arabinopyranoborate (AB-1).

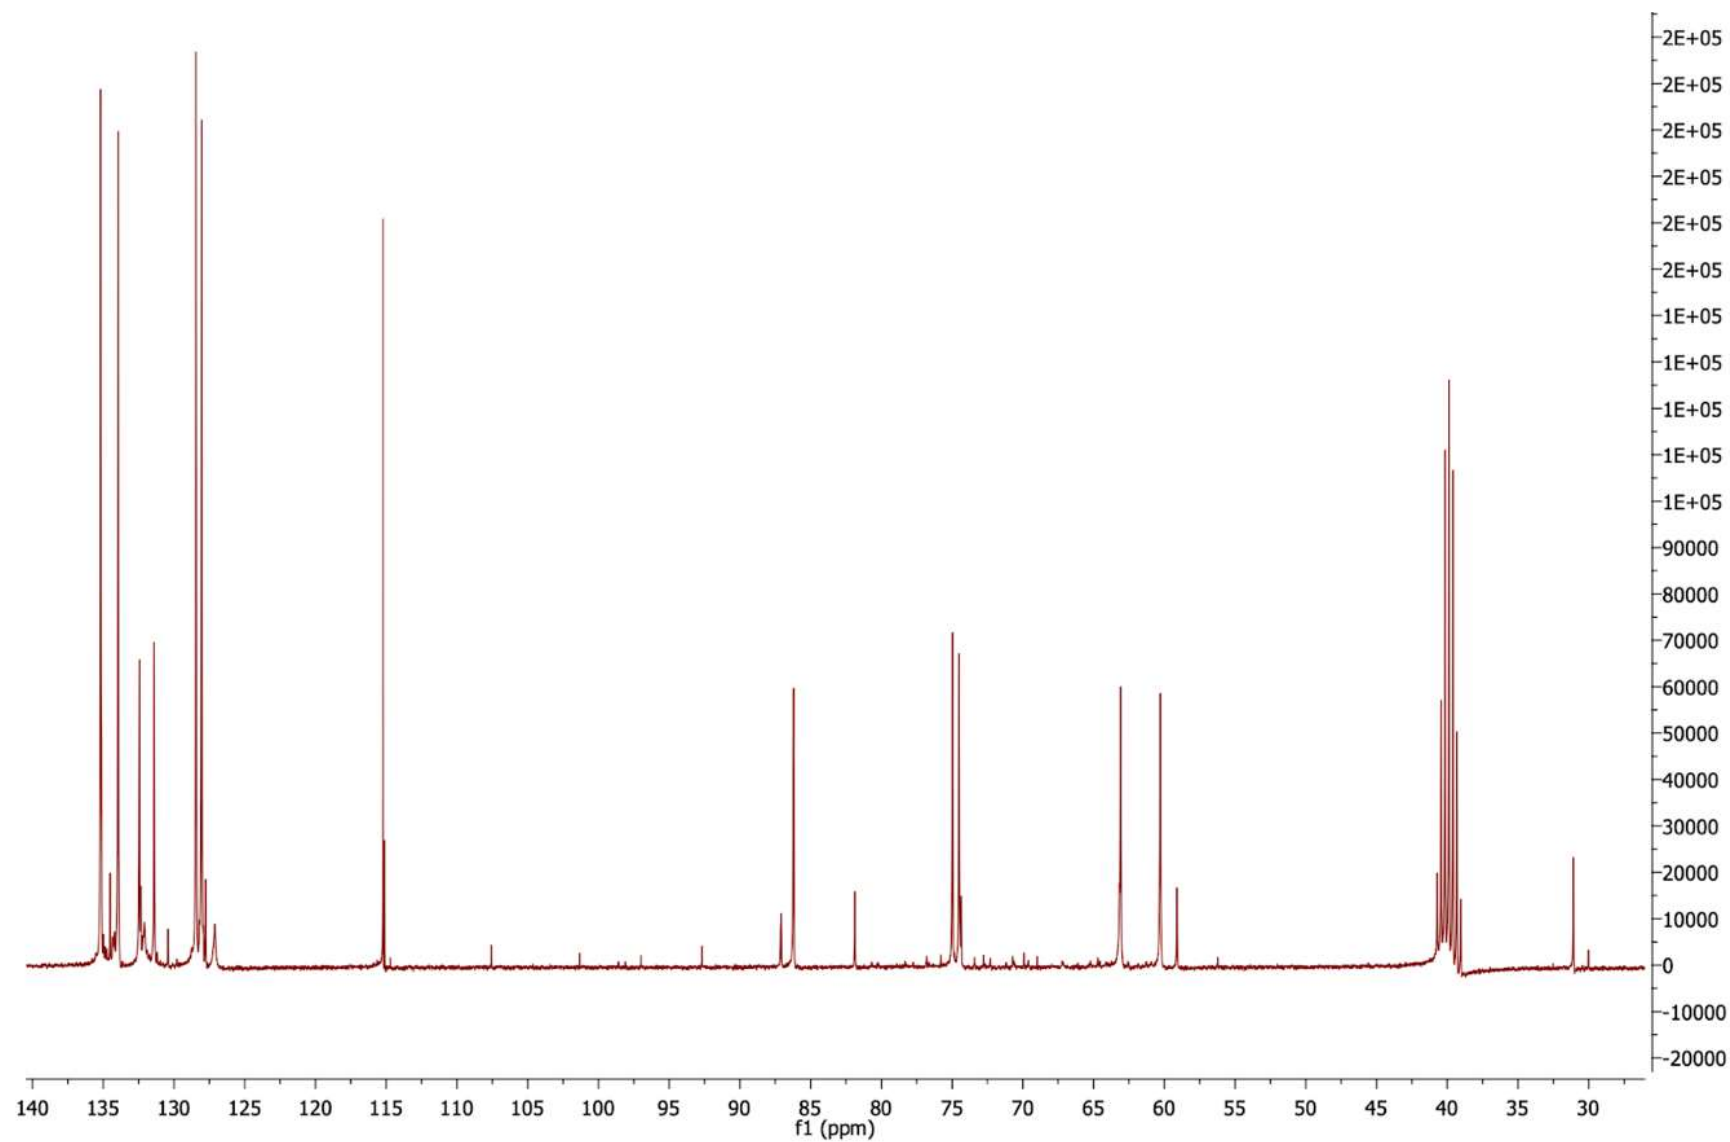

Fig S8.  $^{13}\text{C}$  RMN ( $\text{DMSO}-d_6$ , 76.5 MHz) of the  $\beta$ -D-arabinopyranoborate (AB-1).



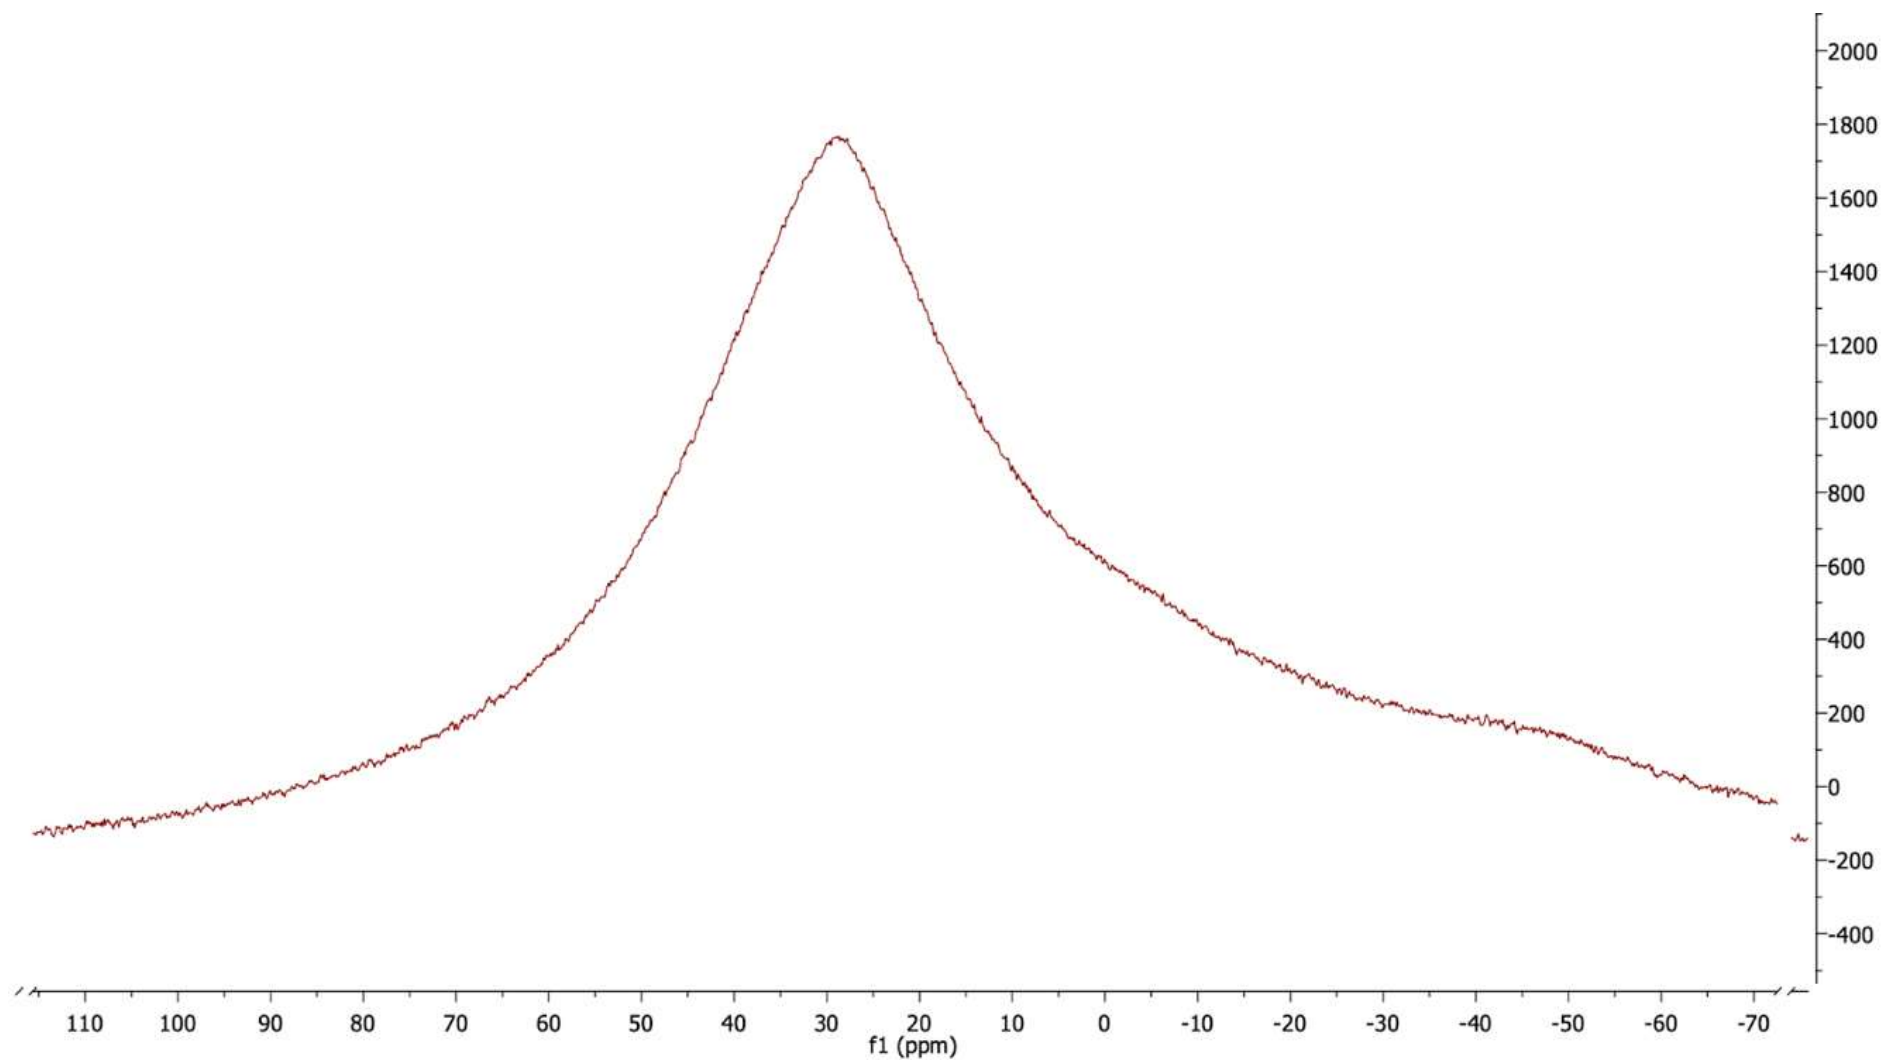

Fig S9.  $^{11}\text{B}$  RMN ( $\text{DMSO}-d_6$ , 96 MHz) of the  $\beta$ -D-arabinopyranoborate (AB-1).

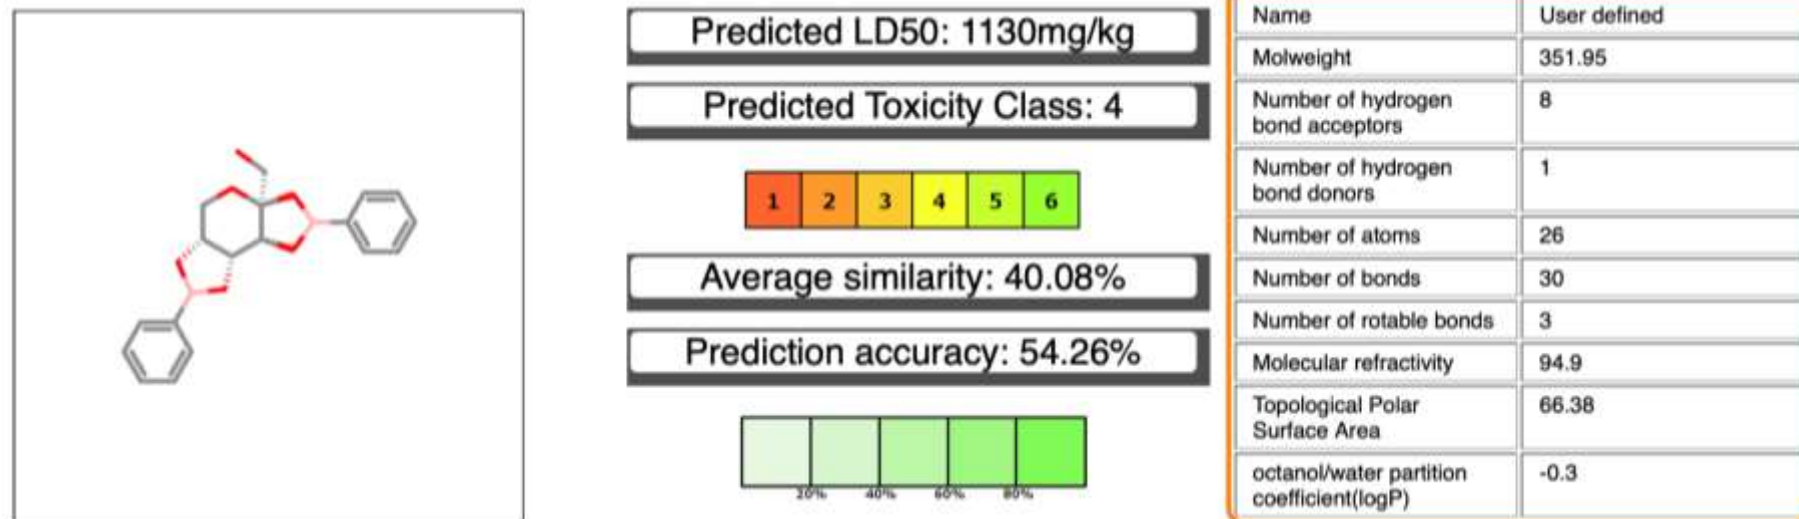

Fig S10. Prediction in the Protox II server for the  $\beta$ -D-fructopyranoborate (FB-1).

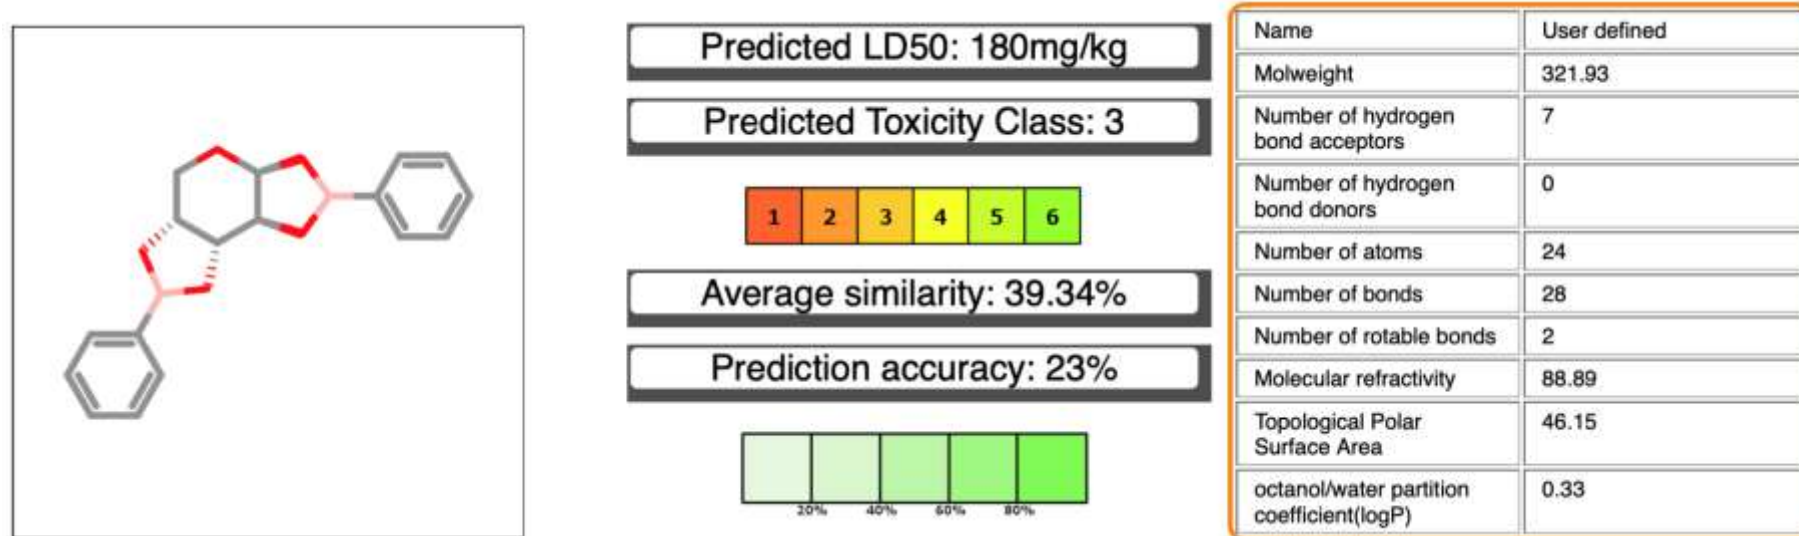

Fig S11. Prediction in the Protox II server for the  $\beta$ -D-arabinopyranoborate (AB-1).

One-step synthesis, crystallography, and acute toxicity of two boronic carbohydrate adducts which induced sedation in mice. Cordova-Chávez et al.

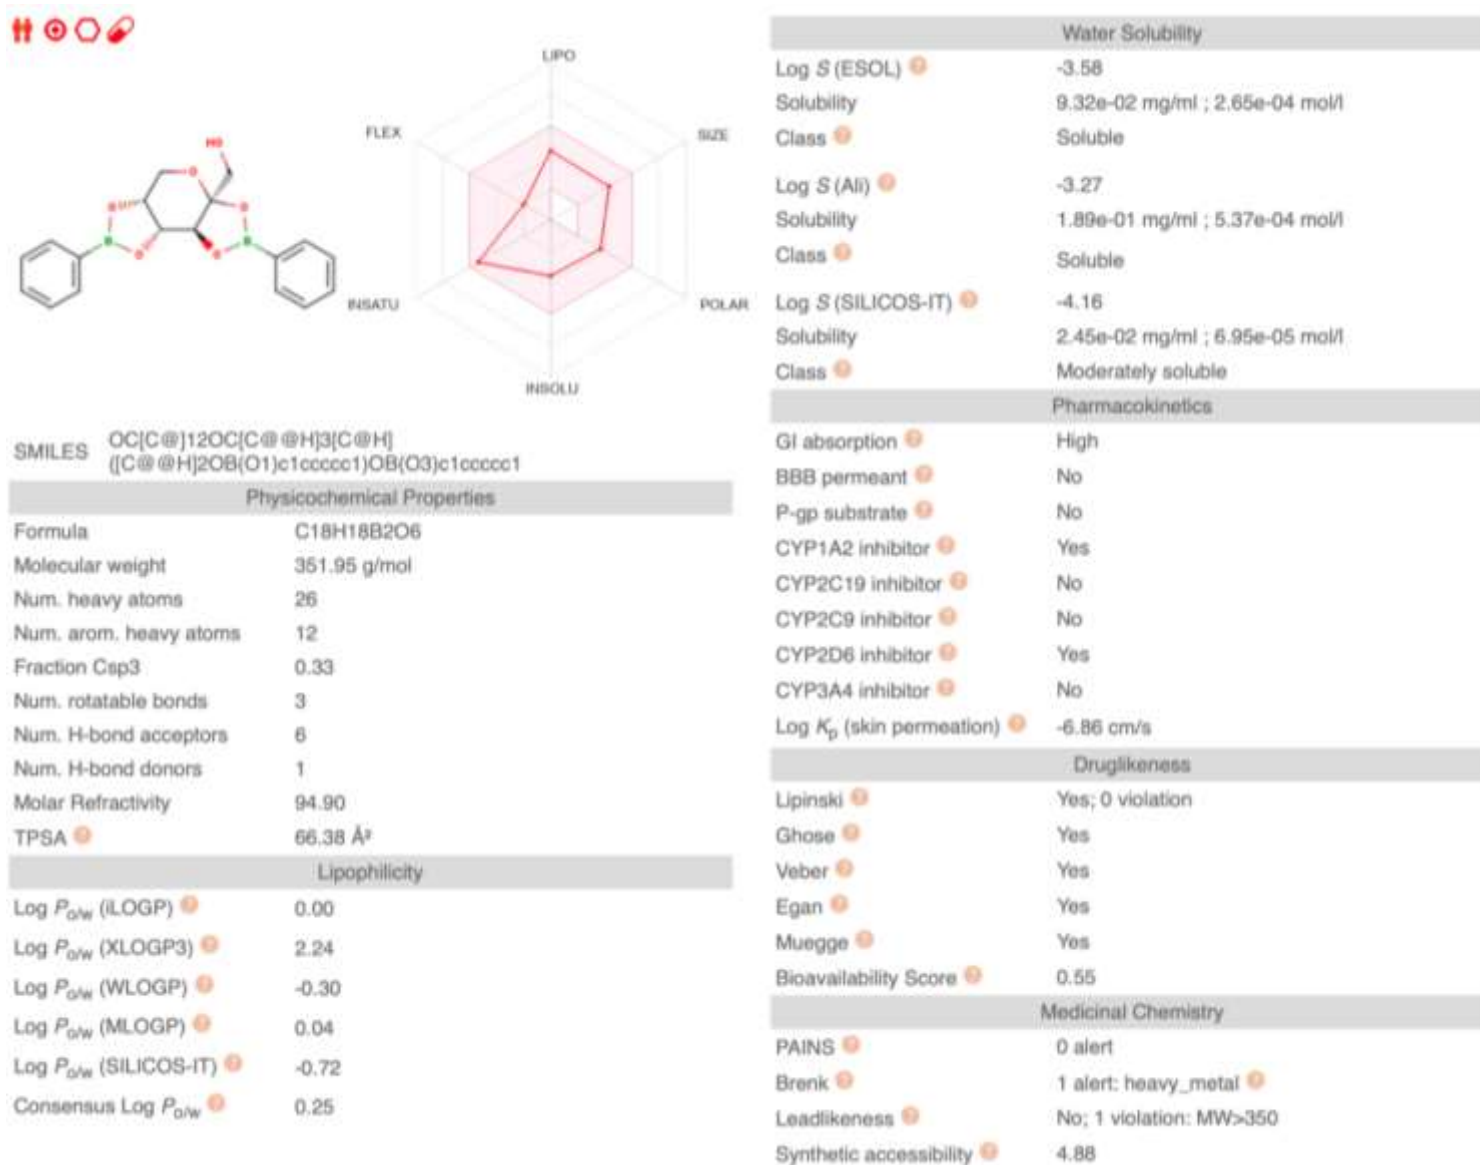

Fig S12. Prediction in the SwissADME server for the β-D-fructopyranoborate (FB-1).

One-step synthesis, crystallography, and acute toxicity of two boronic carbohydrate adducts which induced sedation in mice. Cordova-Chávez et al.

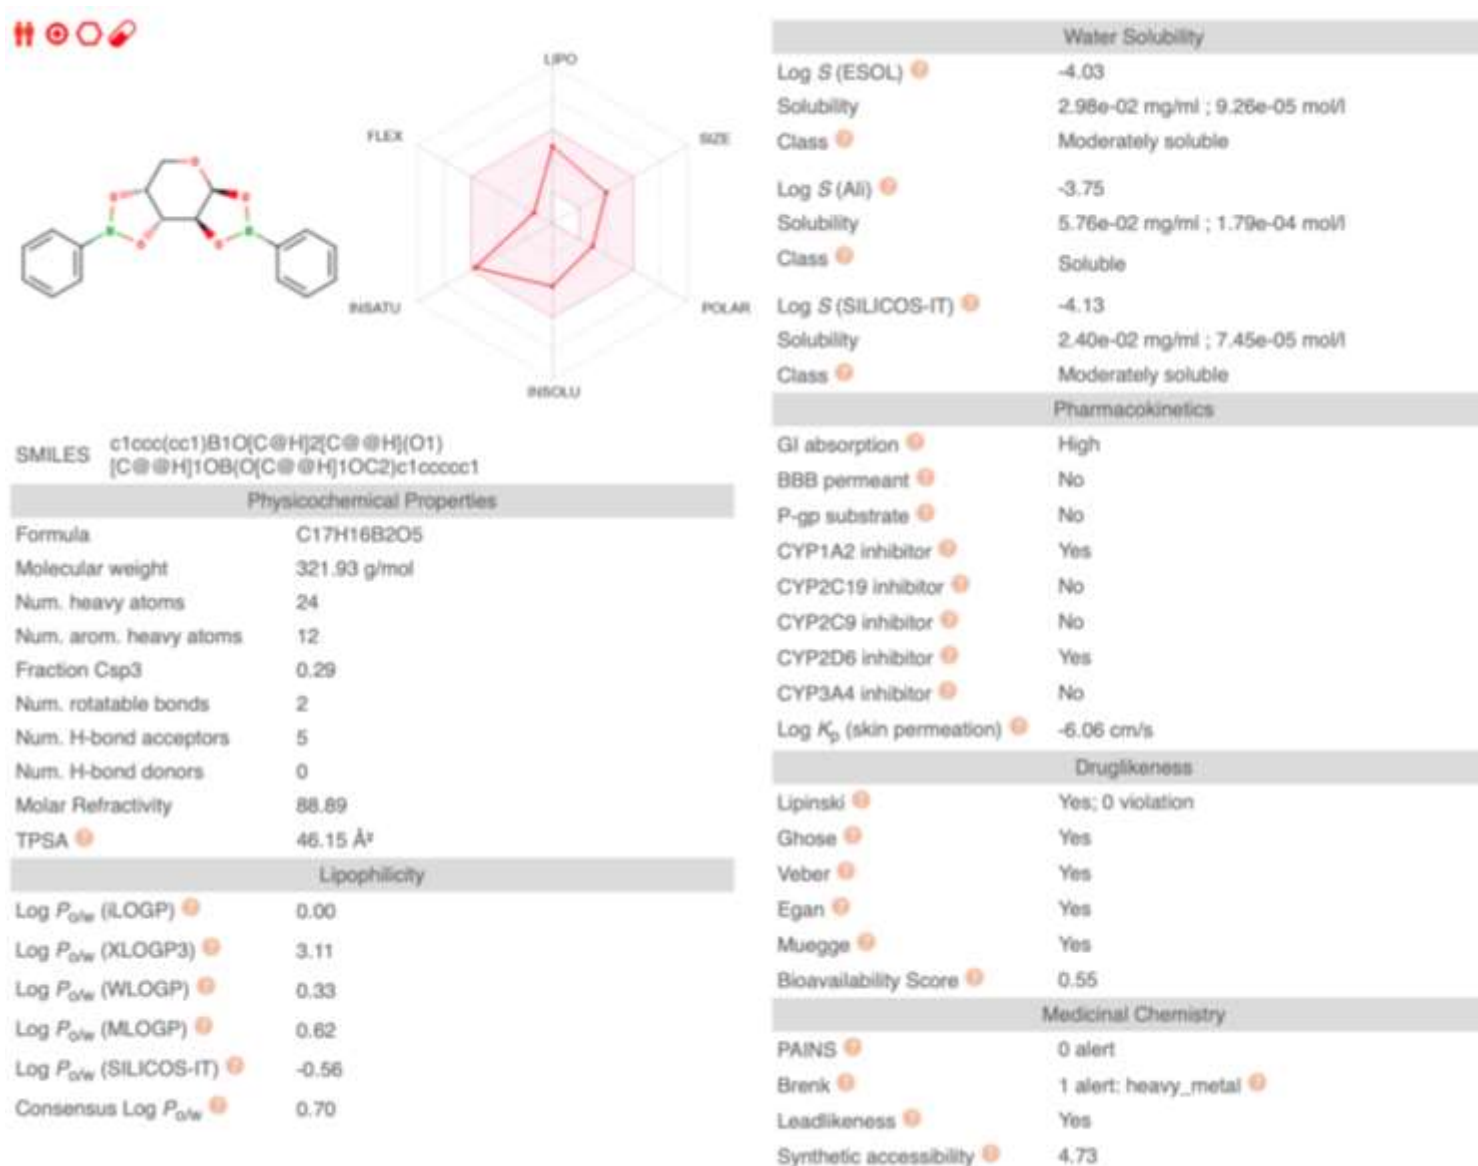

Fig S13. Prediction in the SwissADME server for the  $\beta$ -D-arabinopyranoborate (AB-1).

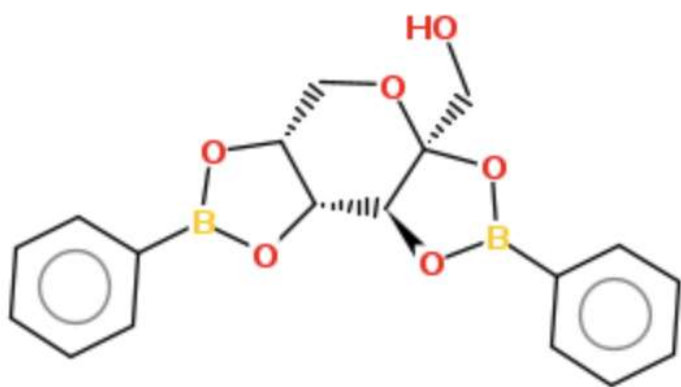

|                        |        |
|------------------------|--------|
| <a href="#">miLogP</a> | 1.70   |
| <a href="#">TPSA</a>   | 66.40  |
| natoms                 | 26     |
| MW                     | 351.96 |
| nON                    | 6      |
| nOHNH                  | 1      |
| nviolations            | 0      |
| nrotb                  | 3      |
| <a href="#">volume</a> | 352.54 |

Fig S14. Prediction in the Molinspiration server for the  $\beta$ -D-fructopyranoborate (FB-1).

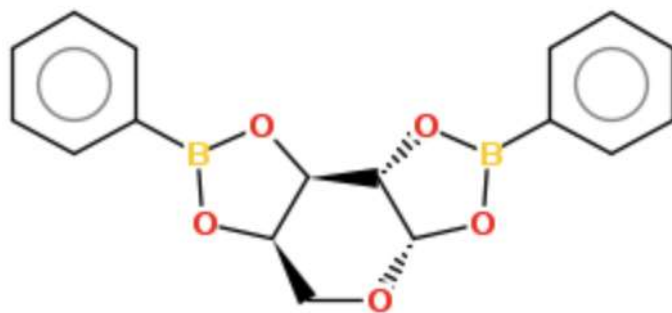

|                        |        |
|------------------------|--------|
| <a href="#">miLogP</a> | 2.26   |
| <a href="#">TPSA</a>   | 46.17  |
| natoms                 | 24     |
| MW                     | 321.93 |
| nON                    | 5      |
| nOHNH                  | 0      |
| nviolations            | 0      |
| nrotb                  | 2      |
| <a href="#">volume</a> | 328.04 |

Fig S15. Prediction in the Molinspiration server for the  $\beta$ -D-arabinopyranoborate (AB-1).

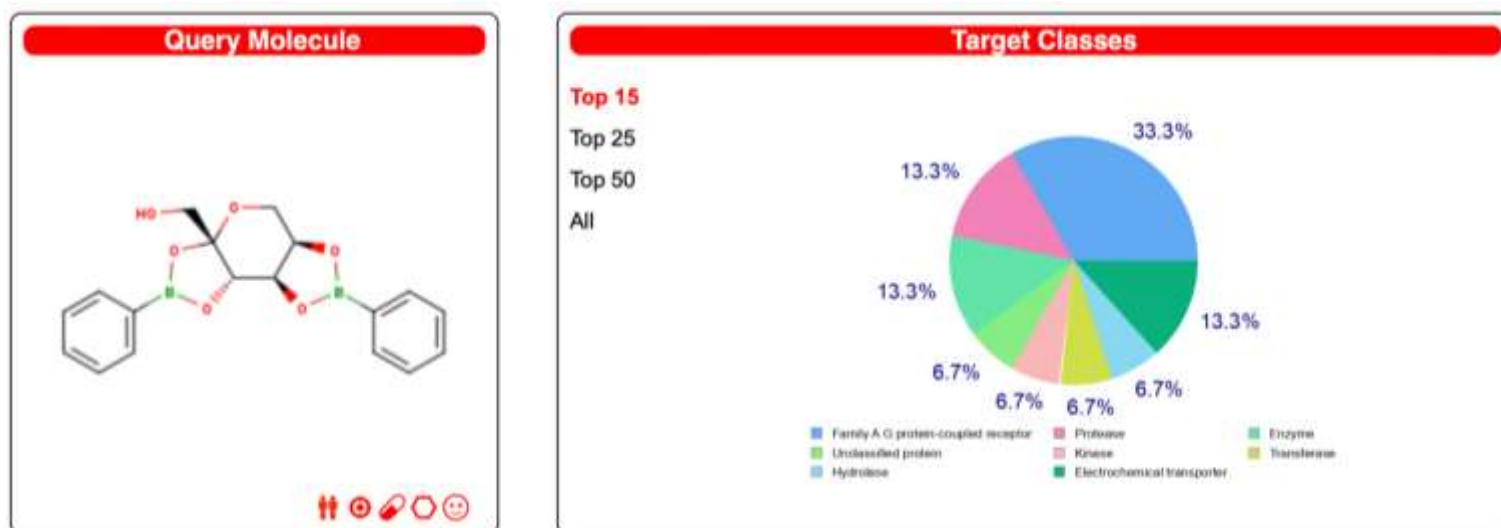

Fig S16. Prediction in the SwissTarget server for the  $\beta$ -D-fructopyranoborate (FB-1).

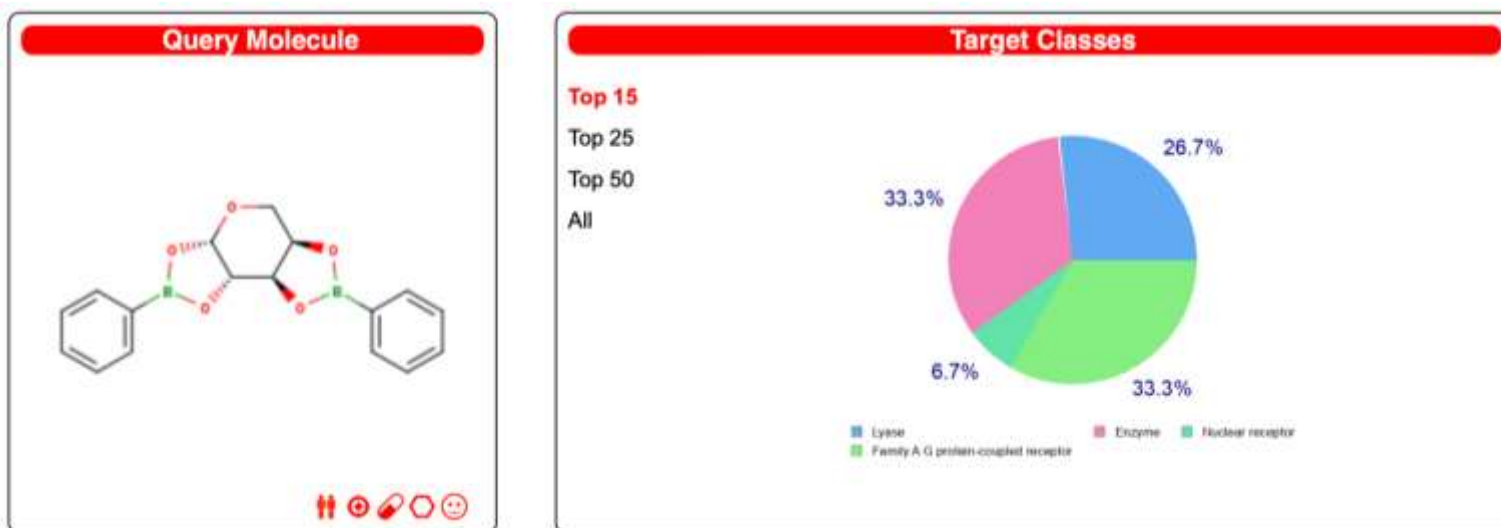

Fig S17. Prediction in the SwissTarget server for the  $\beta$ -D-arabinopyranoborate (AB-1).
